# Supplementary material for: SLC7A14 linked to autosomal recessive retinitis pigmentosa
Source: PubMed Central journal article supplement — Nat Commun. 2014 Mar 27;5:3517. doi: 10.1038/ncomms4517 (PMC3974215; doi:10.1038/ncomms4517), 2014-03-27
Supplement: ncomms4517-s1.pdf [file ncomms4517-s1.pdf]

## SUPPLEMENTARY INFORMATION

### Supplementary Figures

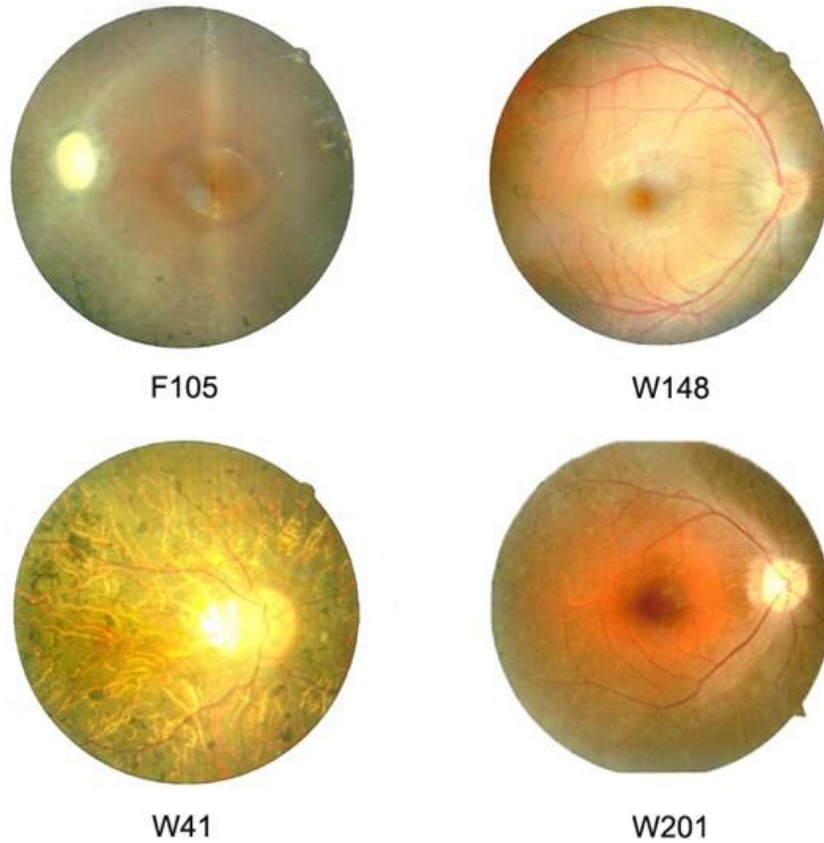

### **Supplementary Fig. 1. Fundoscopy of the four additional patients with distinct SLC7A14 mutations**

Patients with the s mutation displayed typical manifestations in their fundi including peripheral or pan-retina bone-spicule pigmentation, optic disc pallor and arterial attenuation. F105 had a homozygous mutation; W148, W41 and W201 carried two compound mutations.

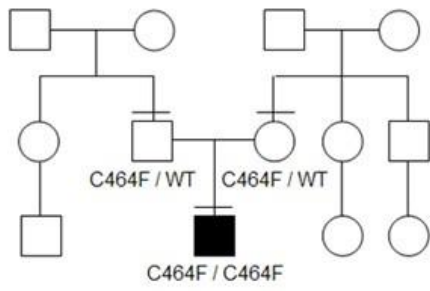

F105

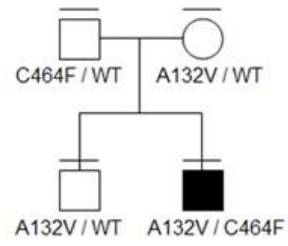

W148

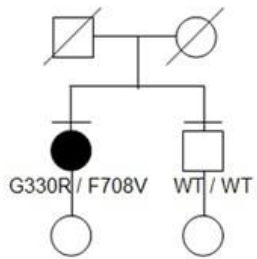

W41

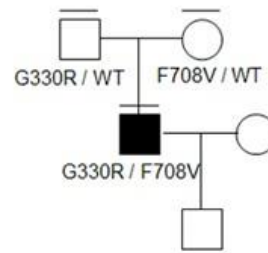

W201

**Supplementary Fig. 2. Pedigrees with SLC7A14 mutations**

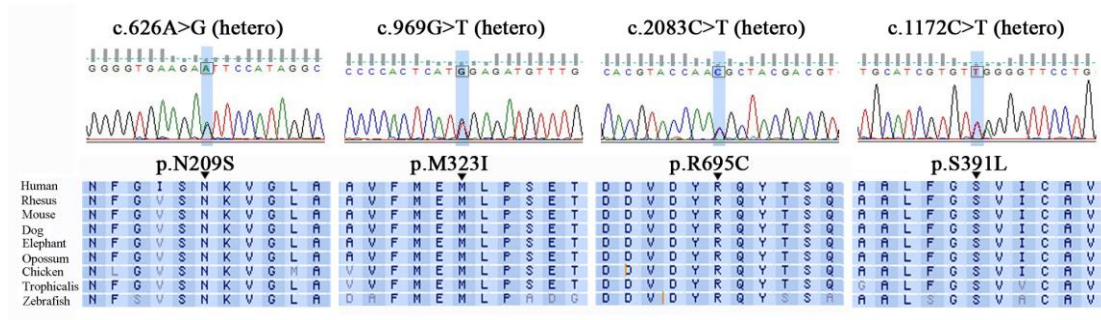

**Supplementary Fig. 3. Identified mutations in the SLC7A14 gene.**

Sequence chromatograms illustrated the causal lesions identified in five unrelated arRP patients. Each mutation leads to alteration of a highly conserved amino acid residue.

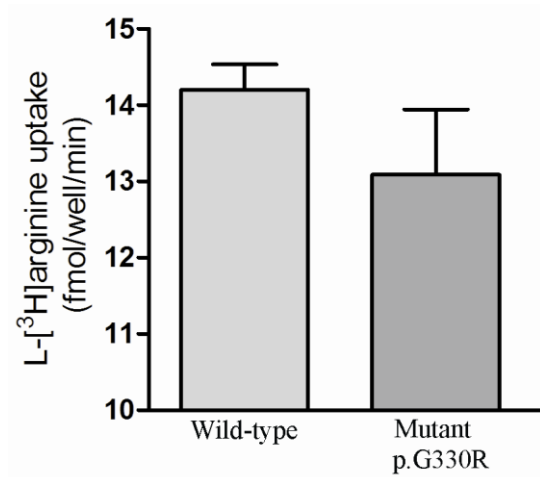

**Supplementary Fig. 4. L-[3H]arginine uptake in photoreceptor cells with either wild-type or mutant *Slc7a14* gene.**

Four independent experiments (N=4) were performed and the results were analyzed using Student's t-test. Bars in the graph represent standard errors of the mean (SEM).

No significance was observed.

**a** Fluoresceinated MO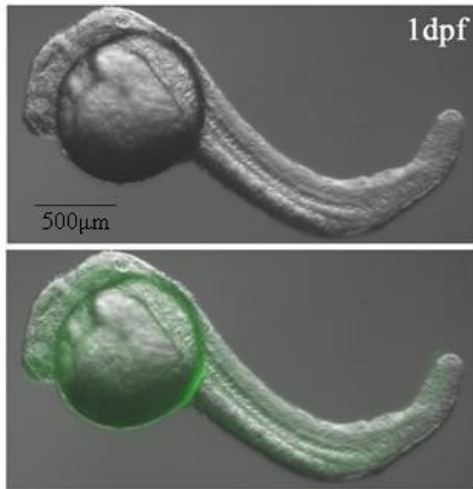**b** RT-PCR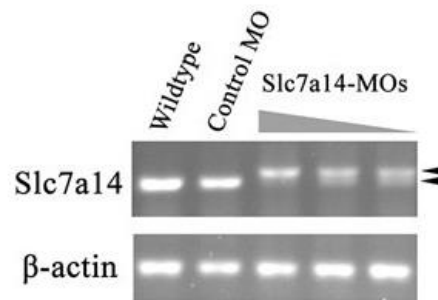**c** Control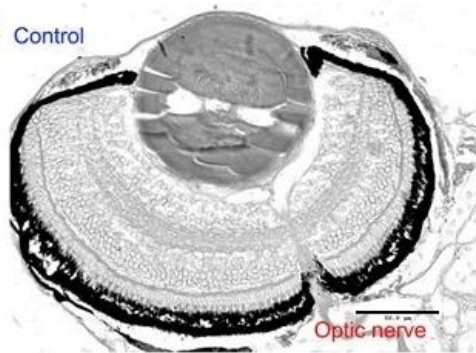

## Slc7a14 MO

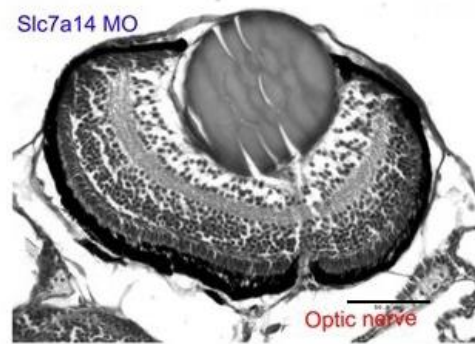**Supplementary Fig. 5. Confirmation of MO injection in zebrafish Larvae.**

(a) After injection of fluoresceinated standard control MO and *Slc7a14* MO solution, fluoresceins were observed in 1 dpf Larvae. Scale bar, 500 $\mu$ m. (b) RT-PCR confirmed splicing change in *Slc7a14*-MO injected larvae. Three doses (1nL of 0.25nM, 0.15nM, 0.05nM) of MOs were tested. (c) Immunohistology demonstrated no significant changes of retinal structure in the *Slc7a14*-MO zebrafish. Each section was shown with optic nerve. Scale bar, 50 $\mu$ m.

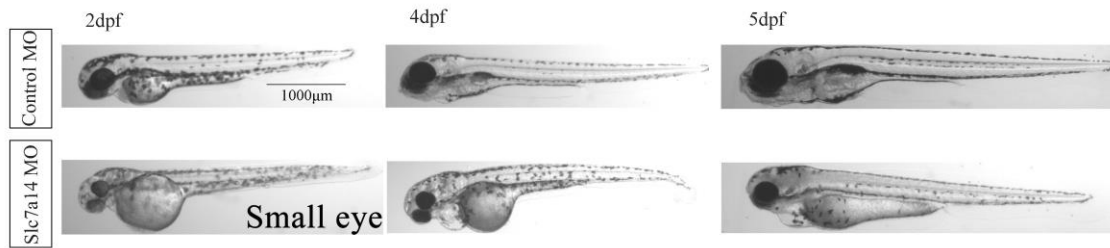

**Supplementary Fig. 6. Representative images of the MO-injected zebrafish.**

Comparing with the control MO-injected zebrafish, Slc7a14-knockdown led to dramatically smaller eye size. Scale bar, 1000µm.

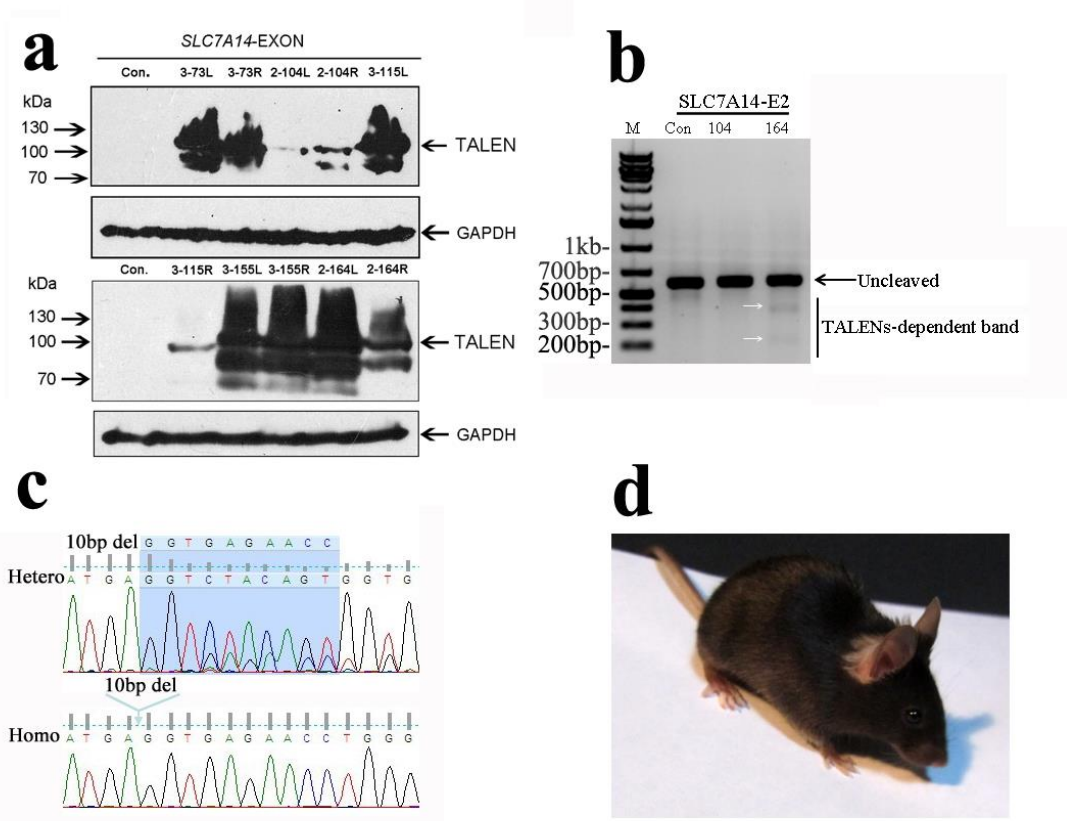

### Supplementary Fig. 7. *Slc7a14*-deficient mice

(a) Western blot confirmed the TALEN expression in the transfected C6 cells. Each lane represents an independent experiment. (b) MSDase assay demonstrated the activity of TALEN pair E2-164. (c) Genotyping of the KO mice revealed a 10bp deletion. Upper image, heterozygous; lower image, homozygous. (d) The *Slc7a14*-deficient mice were viable, fertile and did not show noticeable physical abnormalities.

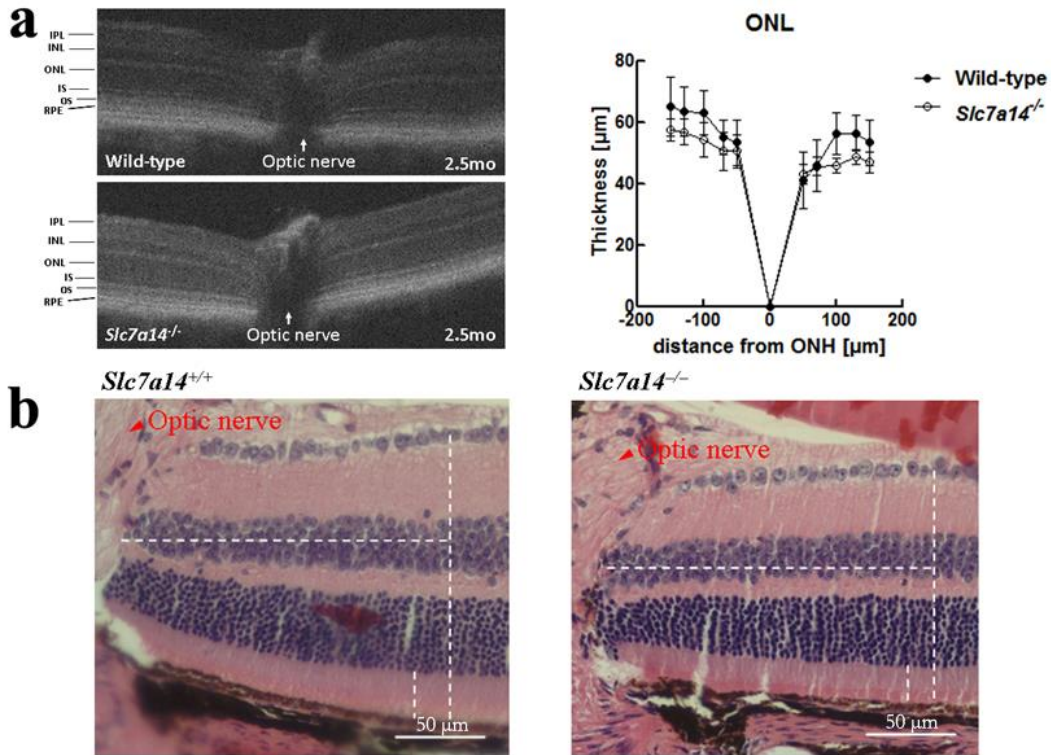

**Supplementary Fig. 8. OCT results of 2.5-month-old *Slc7a14*-KO mouse**

(a) Compared to age-matched wild-type mice, the 2.5-month-old *Slc7a14*<sup>-/-</sup> mice had a thinner outer nuclear layer (2.5-month age, n=3). Due to the limited number of the mice (n=3), we were unable to perform any statistical analyses. Bars represent SEM. Bonferoni test, no statistical significance. (b) HE staining of a histological section of retina shows a thinner retina in the *Slc7a14*<sup>-/-</sup> mice. Each retinal section shows the optic nerve as an internal reference. Scale bar, 50 $\mu\text{m}$ .



Fig. 3a

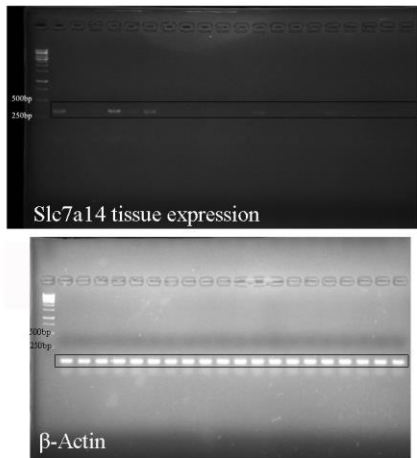

Fig. 3b

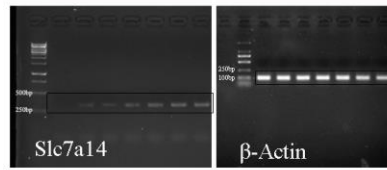

Fig. 3c

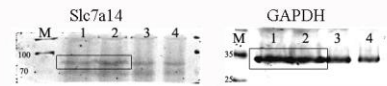

Supplementary fig. 5b

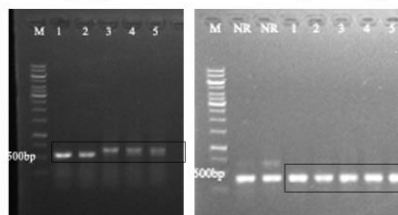

Supplementary fig. 7a

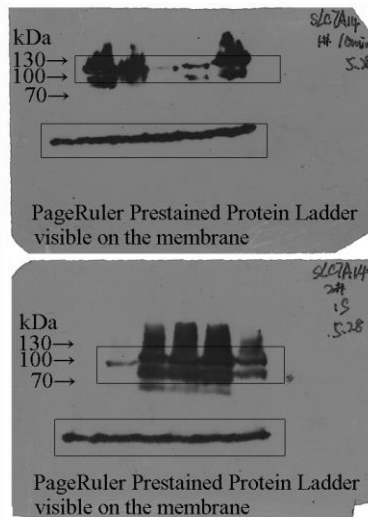

Supplementary fig. 7b

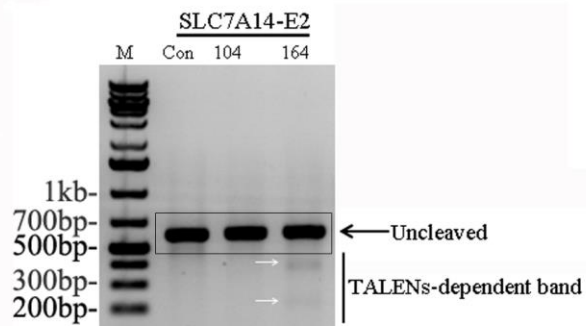

Supplementary Fig. 9. Data of full blots.

Boxes indicate lanes used in the labeled figures.

## Supplementary Tables

**Supplementary Table 1. List of the 15 homozygous variants after adopting filtering**

| <i>Chr</i> | <i>Location</i> | <i>Gene symbol</i>     | <i>Variant</i> | <i>In homo region&gt;1Mb</i> |
|------------|-----------------|------------------------|----------------|------------------------------|
| 1          | 248813827       | <i>OR2T27</i>          | c.359A>G,      | No                           |
| 12         | 53681883        | <i>ESPL1</i>           | c.4304A>T,     | No                           |
| 19         | 36349333        | <i>KIRREL2</i>         | c.235G>A,      | No                           |
| 19         | 38877754        | <i>GGN</i>             | c.148T>C,      | No                           |
| 2          | 219319657       | <i>USP37</i>           | c.2936T>C,     | No                           |
| 7          | 87022264        | <i>CROT</i>            | c.1599C>A,     | No                           |
| 9          | 125512575       | <i>OR1L6</i>           | c.449G>A,      | No                           |
| X          | 154128188       | <i>F8</i>              | c.6226G>A,     | No                           |
| 11         | 47609867        | <i>FAM180B</i>         | c.433G>A,      | No                           |
| <b>11</b>  | 5537592         | <b><i>UBQLNL</i></b>   | c.80C>G,       | <b>Yes</b>                   |
| <b>2</b>   | 21257717        | <b><i>APOB</i></b>     | c.875C>G,      | <b>Yes</b>                   |
| <b>6</b>   | 64422984        | <b><i>PHF3</i></b>     | c.5500C>T,     | <b>Yes</b>                   |
| <b>8</b>   | 27295006        | <b><i>PTK2B</i></b>    | c.1520A>G,     | <b>Yes</b>                   |
| <b>X</b>   | 118586003       | <b><i>SLC25A43</i></b> | c.722G>A,      | <b>Yes</b>                   |
| <b>3</b>   | 170201230       | <b><i>SLC7A14</i></b>  | c.988G>A,      | <b>Yes</b>                   |

**Supplementary Table 2. Primer sets for *SLC7A14* amplification**

| Exon | Forward primer       | Reverse primer               | Tm | Length |
|------|----------------------|------------------------------|----|--------|
| 1    | GAGAAGGCTGCACTGGGTC  | TGATGATCCACTTTTCTGCC         | 58 | 565bp  |
|      | CAGAAGTGAGGTTGGAAGA  | AAGGATGGATAGATTCATAGAG       |    |        |
| 2    | GG                   | AAAG                         | 58 | 576bp  |
| 3    | CCTCGGCCTCCCAGTTTAC  | GGTGATAAAGAGGGTGCTGTG        | 58 | 468bp  |
| 4    | TGCGTGTTTAGCACGAGTTC | GGCTACAGGGGACAAAAGAC         | 58 | 413bp  |
| 5    | GTGAATGGATCCAAACTGCC | GATACATAACAAGGTCCACAGT<br>CC | 58 | 468bp  |
|      | TAAATTGGTGGAGCAGGAC  | CCATAGAACCAGCCAGATTTTC       |    | 1132b  |
| 6    | C                    |                              | 58 | p      |
| 7    | TGTGGATGCAGTGTTGTCAG | GGTGGTTGCACCTAAGATGG         | 58 | 856bp  |

**Supplementary Table 3. Primers for site-directed mutagenesis**

| <b>Primer</b>     | <b>Sequence</b>                           |
|-------------------|-------------------------------------------|
| hSLC7A14-full-F   | GGAGCTCGCCACCATGAGTGGCTTCTTCAC<br>CTCGCTG |
| hSLC7A14-full-R   | GGGTACCGCTCTGGAGAGTAATCTAACTCA<br>TC      |
| hSLC7A14-mut-F    | GTTTGTGGCTCATAGGTTCTATGCTGC               |
| hSLC7A14-mut-R    | GCAGCATAGAACCTATGAGCCACAAAC               |
| hCAT2-NheI-F      | GCTAGCATGATTCCTTGCAGAGCCGC                |
| hCAT2-XhoI-R      | CTCGAGTTAGAATTCACCTTGTCTTTTCATG           |
| hSLC7A14-fusion-F | GGATCCGCCTACACCTACAGCTATG                 |
| hSLC7A14-fusion-R | GGTACCGAAGGAGCAAGACACAGA                  |
